# Supplementary material for: Experimental and Computational Studies on Structure and Energetic Properties of Halogen Derivatives of 2-Deoxy-D-Glucose
Source: PubMed Central journal article supplement (PMC8038202; doi:10.3390/ijms22073720), 2021-04-02
Supplement: ijms-22-03720-s001.pdf [file ijms-22-03720-s001.pdf]

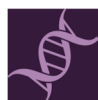

Supplementary materials

**Table S1.** Crystal data and structure refinement details for investigated compounds.

| Compound                                                     | 2-FG                                                                            | 2-CG                                                                            | 2-IG                                                                            | 2-FM                                                                            | 2-CM                                                                            |
|--------------------------------------------------------------|---------------------------------------------------------------------------------|---------------------------------------------------------------------------------|---------------------------------------------------------------------------------|---------------------------------------------------------------------------------|---------------------------------------------------------------------------------|
| Empirical formula                                            | C <sub>6</sub> H <sub>11</sub> FO <sub>5</sub>                                  | C <sub>6</sub> H <sub>11</sub> ClO <sub>5</sub>                                 | C <sub>6</sub> H <sub>11</sub> IO <sub>5</sub>                                  | C <sub>6</sub> H <sub>11</sub> FO <sub>5</sub>                                  | C <sub>6</sub> H <sub>13</sub> ClO <sub>6</sub>                                 |
| Formula weight                                               | 182.15                                                                          | 198.60                                                                          | 290.05                                                                          | 182.15                                                                          | 216.61                                                                          |
| Temperature/K                                                | 100(2)                                                                          | 100(2)                                                                          | 100(2)                                                                          | 100(2)                                                                          | 100(2)                                                                          |
| Crystal system                                               | orthorhombic                                                                    | orthorhombic                                                                    | orthorhombic                                                                    | orthorhombic                                                                    | monoclinic                                                                      |
| Space group                                                  | <i>P</i> 2 <sub>1</sub> 2 <sub>1</sub> 2 <sub>1</sub>                           | <i>P</i> 2 <sub>1</sub> 2 <sub>1</sub> 2 <sub>1</sub>                           | <i>P</i> 2 <sub>1</sub> 2 <sub>1</sub> 2 <sub>1</sub>                           | <i>P</i> 2 <sub>1</sub> 2 <sub>1</sub> 2 <sub>1</sub>                           | <i>P</i> 2 <sub>1</sub>                                                         |
| <i>a</i> /Å                                                  | 6.4109(5)                                                                       | 6.7410(3)                                                                       | 6.3515(3)                                                                       | 6.5318(6)                                                                       | 6.1125(2)                                                                       |
| <i>b</i> /Å                                                  | 10.4044(6)                                                                      | 6.8408(2)                                                                       | 6.6674(3)                                                                       | 10.3558(4)                                                                      | 7.3669(2)                                                                       |
| <i>c</i> /Å                                                  | 11.2128(8)                                                                      | 17.1401(6)                                                                      | 19.9328(8)                                                                      | 11.1207(7)                                                                      | 10.1426(4)                                                                      |
| $\alpha$ /°                                                  | 90                                                                              | 90                                                                              | 90                                                                              | 90                                                                              | 90                                                                              |
| $\beta$ /°                                                   | 90                                                                              | 90                                                                              | 90                                                                              | 90                                                                              | 106.020(4)                                                                      |
| $\gamma$ /°                                                  | 90                                                                              | 90                                                                              | 90                                                                              | 90                                                                              | 90                                                                              |
| Volume/Å <sup>3</sup>                                        | 747.91(9)                                                                       | 790.40(5)                                                                       | 844.12(6)                                                                       | 752.22(8)                                                                       | 438.99(3)                                                                       |
| <i>Z</i>                                                     | 4                                                                               | 4                                                                               | 4                                                                               | 4                                                                               | 2                                                                               |
| $\rho_{\text{calc}}/\text{cm}^3$                             | 1.618                                                                           | 1.669                                                                           | 2.282                                                                           | 1.608                                                                           | 1.639                                                                           |
| $\mu/\text{mm}^{-1}$                                         | 1.372                                                                           | 4.204                                                                           | 29.743                                                                          | 1.364                                                                           | 3.923                                                                           |
| <i>F</i> (000)                                               | 384.0                                                                           | 416.0                                                                           | 560.0                                                                           | 384.0                                                                           | 228.0                                                                           |
| Crystal size/mm <sup>3</sup>                                 | 0.22 × 0.06 × 0.06                                                              | 0.12 × 0.05 × 0.04                                                              | 0.08 × 0.05 × 0.04                                                              | 0.13 × 0.11 × 0.03                                                              | 0.27 × 0.13 × 0.06                                                              |
| Radiation                                                    | CuK $\alpha$ ( $\lambda$ = 1.54184)                                             | CuK $\alpha$ ( $\lambda$ = 1.54184)                                             | CuK $\alpha$ ( $\lambda$ = 1.54184)                                             | CuK $\alpha$ ( $\lambda$ = 1.54184)                                             | CuK $\alpha$ ( $\lambda$ = 1.54184)                                             |
| 2 $\theta$ range for data collection/°                       | 11.602 to 134.152                                                               | 10.322 to 134.108                                                               | 8.872 to 134.134                                                                | 11.676 to 134.148                                                               | 9.072 to 134.082                                                                |
| Index ranges                                                 | $-7 \leq h \leq 7,$                                                             | $-8 \leq h \leq 8,$                                                             | $-7 \leq h \leq 7,$                                                             | $-7 \leq h \leq 7,$                                                             | $-7 \leq h \leq 7,$                                                             |
|                                                              | $-12 \leq k \leq 12,$                                                           | $-8 \leq k \leq 8,$                                                             | $-7 \leq k \leq 7,$                                                             | $-12 \leq k \leq 12,$                                                           | $-8 \leq k \leq 8,$                                                             |
|                                                              | $-13 \leq l \leq 13$                                                            | $-20 \leq l \leq 20$                                                            | $-23 \leq l \leq 23$                                                            | $-13 \leq l \leq 13$                                                            | $-12 \leq l \leq 12$                                                            |
| Reflections collected                                        | 10763                                                                           | 10825                                                                           | 11303                                                                           | 11274                                                                           | 5555                                                                            |
| Independent reflections                                      | 1341 [ <i>R</i> <sub>int</sub> = 0.0775,<br><i>R</i> <sub>sigma</sub> = 0.0362] | 1410 [ <i>R</i> <sub>int</sub> = 0.0431,<br><i>R</i> <sub>sigma</sub> = 0.0215] | 1498 [ <i>R</i> <sub>int</sub> = 0.0463,<br><i>R</i> <sub>sigma</sub> = 0.0233] | 1343 [ <i>R</i> <sub>int</sub> = 0.0585,<br><i>R</i> <sub>sigma</sub> = 0.0307] | 1559 [ <i>R</i> <sub>int</sub> = 0.0181,<br><i>R</i> <sub>sigma</sub> = 0.0144] |
| Data/restraints/parameters                                   | 1341/4/121                                                                      | 1410/4/121                                                                      | 1498/4/121                                                                      | 1343/4/121                                                                      | 1559/8/138                                                                      |
| Goodness-of-fit on <i>F</i> <sup>2</sup>                     | 1.081                                                                           | 1.071                                                                           | 1.105                                                                           | 1.067                                                                           | 1.112                                                                           |
| Final <i>R</i> indexes [ <i>I</i> ≥ 2 $\sigma$ ( <i>I</i> )] | <i>R</i> <sub>1</sub> = 0.0417,<br>w <i>R</i> <sub>2</sub> = 0.1068             | <i>R</i> <sub>1</sub> = 0.0245,<br>w <i>R</i> <sub>2</sub> = 0.0587             | <i>R</i> <sub>1</sub> = 0.0290,<br>w <i>R</i> <sub>2</sub> = 0.0700             | <i>R</i> <sub>1</sub> = 0.0476,<br>w <i>R</i> <sub>2</sub> = 0.1244             | <i>R</i> <sub>1</sub> = 0.0193,<br>w <i>R</i> <sub>2</sub> = 0.0515             |
|                                                              | <i>R</i> <sub>1</sub> = 0.0447,<br>w <i>R</i> <sub>2</sub> = 0.1096             | <i>R</i> <sub>1</sub> = 0.0270,<br>w <i>R</i> <sub>2</sub> = 0.0602             | <i>R</i> <sub>1</sub> = 0.0291,<br>w <i>R</i> <sub>2</sub> = 0.0700             | <i>R</i> <sub>1</sub> = 0.0528, w <i>R</i> <sub>2</sub> =<br>0.1285             | <i>R</i> <sub>1</sub> = 0.0195,<br>w <i>R</i> <sub>2</sub> = 0.0519             |
| Largest diff. peak/hole / e Å <sup>-3</sup>                  | 0.36/-0.28                                                                      | 0.25/-0.19                                                                      | 1.26/-1.00                                                                      | 0.63/-0.25                                                                      | 0.21/-0.17                                                                      |
| Flack parameter                                              | 0.08(14)                                                                        | -0.013(8)                                                                       | -0.017(9)                                                                       | 0.01(17)                                                                        | -0.019(10)                                                                      |

**Table S2.** Bond lengths for 2-FG

| Atom | Atom | Length/Å | Atom | Atom | Length/Å |
|------|------|----------|------|------|----------|
| C(1) | C(2) | 1.521(5) | C(3) | O(3) | 1.422(4) |
| C(1) | O(1) | 1.387(4) | C(4) | C(5) | 1.522(4) |
| C(1) | O(5) | 1.432(4) | C(4) | O(4) | 1.428(4) |
| C(2) | C(3) | 1.520(4) | C(5) | C(6) | 1.516(4) |
| C(2) | F(1) | 1.408(4) | C(5) | O(5) | 1.438(4) |
| C(3) | C(4) | 1.528(5) | C(6) | O(6) | 1.432(4) |

**Table S3.** Values of valence angles for 2-FG

| Atom | Atom | Atom | Angle/°  | Atom | Atom | Atom | Angle/°  |
|------|------|------|----------|------|------|------|----------|
| O(1) | C(1) | C(2) | 109.0(3) | C(5) | C(4) | C(3) | 111.1(3) |
| O(1) | C(1) | O(5) | 108.2(2) | O(4) | C(4) | C(3) | 111.4(2) |
| O(5) | C(1) | C(2) | 108.6(2) | O(4) | C(4) | C(5) | 106.9(2) |
| C(3) | C(2) | C(1) | 112.3(3) | C(6) | C(5) | C(4) | 113.8(3) |
| F(1) | C(2) | C(1) | 108.0(3) | O(5) | C(5) | C(4) | 109.0(2) |
| F(1) | C(2) | C(3) | 108.2(2) | O(5) | C(5) | C(6) | 107.4(2) |
| C(2) | C(3) | C(4) | 110.8(2) | O(6) | C(6) | C(5) | 109.3(3) |
| O(3) | C(3) | C(2) | 109.6(3) | C(1) | O(5) | C(5) | 112.5(2) |
| O(3) | C(3) | C(4) | 109.0(3) |      |      |      |          |

**Table S4.** Values of torsion angles for 2-FG

| A    | B    | C    | D    | Angle/°   | A    | B    | C    | D    | Angle/°   |
|------|------|------|------|-----------|------|------|------|------|-----------|
| C(1) | C(2) | C(3) | C(4) | -49.1(3)  | F(1) | C(2) | C(3) | O(3) | 71.3(3)   |
| C(1) | C(2) | C(3) | O(3) | -169.5(2) | O(1) | C(1) | C(2) | C(3) | 172.8(3)  |
| C(2) | C(1) | O(5) | C(5) | -63.9(3)  | O(1) | C(1) | C(2) | F(1) | -67.9(3)  |
| C(2) | C(3) | C(4) | C(5) | 49.2(3)   | O(1) | C(1) | O(5) | C(5) | 177.9(2)  |
| C(2) | C(3) | C(4) | O(4) | 168.3(3)  | O(3) | C(3) | C(4) | C(5) | 169.9(2)  |
| C(3) | C(4) | C(5) | C(6) | -175.8(2) | O(3) | C(3) | C(4) | O(4) | -71.0(3)  |
| C(3) | C(4) | C(5) | O(5) | -55.9(3)  | O(4) | C(4) | C(5) | C(6) | 62.5(3)   |
| C(4) | C(5) | C(6) | O(6) | 59.7(3)   | O(4) | C(4) | C(5) | O(5) | -177.7(2) |
| C(4) | C(5) | O(5) | C(1) | 64.8(3)   | O(5) | C(1) | C(2) | C(3) | 55.2(3)   |
| C(6) | C(5) | O(5) | C(1) | -171.4(3) | O(5) | C(1) | C(2) | F(1) | 174.4(2)  |
| F(1) | C(2) | C(3) | C(4) | -168.3(3) | O(5) | C(5) | C(6) | O(6) | -61.0(3)  |

**Table S6.** Values of valence angles for 2-CG

| Atom | Atom | Atom  | Angle/°    | Atom | Atom | Atom | Angle/°    |
|------|------|-------|------------|------|------|------|------------|
| O(1) | C(1) | C(2)  | 113.1(2)   | C(5) | C(4) | C(3) | 110.0(2)   |
| O(1) | C(1) | O(5)  | 108.4(2)   | O(4) | C(4) | C(3) | 109.9(2)   |
| O(5) | C(1) | C(2)  | 108.10(19) | O(4) | C(4) | C(5) | 107.88(19) |
| C(1) | C(2) | Cl(1) | 108.70(16) | C(6) | C(5) | C(4) | 114.0(2)   |
| C(3) | C(2) | C(1)  | 111.4(2)   | O(5) | C(5) | C(4) | 107.9(2)   |
| C(3) | C(2) | Cl(1) | 109.22(18) | O(5) | C(5) | C(6) | 109.3(2)   |
| C(2) | C(3) | C(4)  | 110.3(2)   | O(6) | C(6) | C(5) | 115.0(2)   |
| O(3) | C(3) | C(2)  | 108.3(2)   | C(1) | O(5) | C(5) | 111.0(2)   |
| O(3) | C(3) | C(4)  | 110.4(2)   |      |      |      |            |

**Table S5.** Bond lengths for 2-DG

| Atom | Atom  | Length/Å | Atom | Atom | Length/Å |
|------|-------|----------|------|------|----------|
| C(1) | C(2)  | 1.536(3) | C(3) | O(3) | 1.425(3) |
| C(1) | O(1)  | 1.387(3) | C(4) | C(5) | 1.522(4) |
| C(1) | O(5)  | 1.427(3) | C(4) | O(4) | 1.428(3) |
| C(2) | C(3)  | 1.522(3) | C(5) | C(6) | 1.510(4) |
| C(2) | Cl(1) | 1.807(2) | C(5) | O(5) | 1.437(3) |
| C(3) | C(4)  | 1.526(4) | C(6) | O(6) | 1.426(3) |

**Table S7.** Values of torsion angles for 2-CG

| A     | B    | C    | D    | Angle/°     | A     | B    | C    | D     | Angle/°     |
|-------|------|------|------|-------------|-------|------|------|-------|-------------|
| C(1)  | C(2) | C(3) | C(4) | -50.0(3)    | Cl(1) | C(2) | C(3) | O(3)  | 69.0(2)     |
| C(1)  | C(2) | C(3) | O(3) | -170.93(19) | O(1)  | C(1) | C(2) | C(3)  | 176.0(2)    |
| C(2)  | C(1) | O(5) | C(5) | -65.9(2)    | O(1)  | C(1) | C(2) | Cl(1) | -63.5(2)    |
| C(2)  | C(3) | C(4) | C(5) | 51.7(3)     | O(1)  | C(1) | O(5) | C(5)  | 171.16(19)  |
| C(2)  | C(3) | C(4) | O(4) | 170.3(2)    | O(3)  | C(3) | C(4) | C(5)  | 171.3(2)    |
| C(3)  | C(4) | C(5) | C(6) | 178.8(2)    | O(3)  | C(3) | C(4) | O(4)  | -70.0(2)    |
| C(3)  | C(4) | C(5) | O(5) | -59.6(3)    | O(4)  | C(4) | C(5) | C(6)  | 58.9(3)     |
| C(4)  | C(5) | C(6) | O(6) | 56.6(3)     | O(4)  | C(4) | C(5) | O(5)  | -179.52(19) |
| C(4)  | C(5) | O(5) | C(1) | 68.4(3)     | O(5)  | C(1) | C(2) | C(3)  | 56.0(3)     |
| C(6)  | C(5) | O(5) | C(1) | -167.1(2)   | O(5)  | C(1) | C(2) | Cl(1) | 176.45(16)  |
| Cl(1) | C(2) | C(3) | C(4) | -170.15(16) | O(5)  | C(5) | C(6) | O(6)  | -64.3(3)    |

**Table S8.** Bond lengths for 2-IG

| Atom | Atom | Length/Å  | Atom | Atom | Length/Å  |
|------|------|-----------|------|------|-----------|
| C(1) | C(2) | 1.528(11) | C(3) | O(2) | 1.426(10) |
| C(1) | O(1) | 1.352(12) | C(4) | C(5) | 1.534(11) |
| C(1) | O(5) | 1.429(10) | C(4) | O(3) | 1.422(10) |
| C(2) | C(3) | 1.508(12) | C(5) | C(6) | 1.510(12) |
| C(2) | I(1) | 2.167(8)  | C(5) | O(5) | 1.460(10) |
| C(3) | C(4) | 1.518(12) | C(6) | O(6) | 1.421(10) |

**Table S9.** Values of valence angles for 2-IG

| Atom | Atom | Atom | Angle/°  | Atom | Atom | Atom | Angle/°  |
|------|------|------|----------|------|------|------|----------|
| O(1) | C(1) | C(2) | 111.8(7) | C(3) | C(4) | C(5) | 109.4(7) |
| O(1) | C(1) | O(5) | 112.5(7) | O(3) | C(4) | C(3) | 110.6(7) |
| O(5) | C(1) | C(2) | 107.6(7) | O(3) | C(4) | C(5) | 109.3(7) |
| C(1) | C(2) | I(1) | 109.3(5) | C(6) | C(5) | C(4) | 115.0(7) |
| C(3) | C(2) | C(1) | 114.0(7) | O(5) | C(5) | C(4) | 107.5(7) |
| C(3) | C(2) | I(1) | 110.9(5) | O(5) | C(5) | C(6) | 108.4(7) |
| C(2) | C(3) | C(4) | 108.2(7) | O(6) | C(6) | C(5) | 113.7(7) |
| O(2) | C(3) | C(2) | 110.5(7) | C(1) | O(5) | C(5) | 113.9(6) |
| O(2) | C(3) | C(4) | 108.1(7) |      |      |      |          |

**Table S10.** Values of torsion angles for 2-IG

| A    | B    | C    | D    | Angle/°   | A    | B    | C    | D    | Angle/°  |
|------|------|------|------|-----------|------|------|------|------|----------|
| C(1) | C(2) | C(3) | C(4) | -54.2(9)  | I(1) | C(2) | C(3) | O(2) | 63.9(8)  |
| C(1) | C(2) | C(3) | O(2) | -172.3(7) | O(1) | C(1) | C(2) | C(3) | -69.8(9) |
| C(2) | C(1) | O(5) | C(5) | -59.5(9)  | O(1) | C(1) | C(2) | I(1) | 54.9(8)  |
| C(2) | C(3) | C(4) | C(5) | 56.5(9)   | O(1) | C(1) | O(5) | C(5) | 64.2(9)  |
| C(2) | C(3) | C(4) | O(3) | 177.0(7)  | O(2) | C(3) | C(4) | C(5) | 176.1(7) |
| C(3) | C(4) | C(5) | C(6) | 178.2(7)  | O(2) | C(3) | C(4) | O(3) | -63.4(9) |
| C(3) | C(4) | C(5) | O(5) | -60.9(8)  | O(3) | C(4) | C(5) | C(6) | 56.9(9)  |
| C(4) | C(5) | C(6) | O(6) | 51.1(10)  | O(3) | C(4) | C(5) | O(5) | 177.8(6) |
| C(4) | C(5) | O(5) | C(1) | 64.4(8)   | O(5) | C(1) | C(2) | C(3) | 54.2(9)  |
| C(6) | C(5) | O(5) | C(1) | -170.7(6) | O(5) | C(1) | C(2) | I(1) | 178.9(5) |
| I(1) | C(2) | C(3) | C(4) | -178.0(5) | O(5) | C(5) | C(6) | O(6) | -69.2(8) |

**Table S12.** Values of valence angles for 2-FM

| Atom | Atom | Atom | Angle/°  | Atom | Atom | Atom | Angle/°  |
|------|------|------|----------|------|------|------|----------|
| O(1) | C(1) | C(2) | 109.1(3) | C(3) | C(4) | C(5) | 110.5(4) |
| O(1) | C(1) | O(5) | 107.4(3) | O(4) | C(4) | C(3) | 112.7(3) |
| O(5) | C(1) | C(2) | 109.9(3) | O(4) | C(4) | C(5) | 107.5(3) |
| C(1) | C(2) | C(3) | 112.2(3) | C(6) | C(5) | C(4) | 113.4(4) |
| F(1) | C(2) | C(1) | 107.6(3) | O(5) | C(5) | C(4) | 109.1(3) |
| F(1) | C(2) | C(3) | 107.7(3) | O(5) | C(5) | C(6) | 107.3(3) |
| C(2) | C(3) | C(4) | 110.2(3) | O(6) | C(6) | C(5) | 109.2(3) |
| O(3) | C(3) | C(2) | 109.6(3) | C(1) | O(5) | C(5) | 112.8(3) |
| O(3) | C(3) | C(4) | 109.8(4) |      |      |      |          |

**Table S11.** Bond lengths for 2-FM

| Atom | Atom | Length/Å | Atom | Atom | Length/Å |
|------|------|----------|------|------|----------|
| C(1) | C(2) | 1.514(6) | C(3) | O(3) | 1.421(5) |
| C(1) | O(1) | 1.386(5) | C(4) | C(5) | 1.524(5) |
| C(1) | O(5) | 1.435(5) | C(4) | O(4) | 1.426(5) |
| C(2) | C(3) | 1.522(6) | C(5) | C(6) | 1.510(6) |
| C(2) | F(1) | 1.415(4) | C(5) | O(5) | 1.441(5) |
| C(3) | C(4) | 1.523(6) | C(6) | O(6) | 1.431(5) |

**Table S13.** Values of torsion angles for 2-FM

| A    | B    | C    | D    | Angle/°   | A    | B    | C    | D    | Angle/°   |
|------|------|------|------|-----------|------|------|------|------|-----------|
| C(1) | C(2) | C(3) | C(4) | -50.6(4)  | F(1) | C(2) | C(3) | O(3) | -53.3(4)  |
| C(1) | C(2) | C(3) | O(3) | -171.5(3) | O(1) | C(1) | C(2) | C(3) | 171.4(3)  |
| C(2) | C(1) | O(5) | C(5) | -60.9(4)  | O(1) | C(1) | C(2) | F(1) | 53.1(4)   |
| C(2) | C(3) | C(4) | C(5) | 52.3(4)   | O(1) | C(1) | O(5) | C(5) | -179.5(3) |
| C(2) | C(3) | C(4) | O(4) | 172.5(3)  | O(3) | C(3) | C(4) | C(5) | 173.1(3)  |
| C(3) | C(4) | C(5) | C(6) | -177.3(3) | O(3) | C(3) | C(4) | O(4) | -66.7(4)  |
| C(3) | C(4) | C(5) | O(5) | -57.8(4)  | O(4) | C(4) | C(5) | C(6) | 59.4(4)   |
| C(4) | C(5) | C(6) | O(6) | 56.4(4)   | O(4) | C(4) | C(5) | O(5) | 178.9(3)  |
| C(4) | C(5) | O(5) | C(1) | 63.1(4)   | O(5) | C(1) | C(2) | C(3) | 53.9(4)   |
| C(6) | C(5) | O(5) | C(1) | -173.6(3) | O(5) | C(1) | C(2) | F(1) | -64.4(4)  |
| F(1) | C(2) | C(3) | C(4) | 67.6(4)   | O(5) | C(5) | C(6) | O(6) | -64.2(4)  |

**Table S14.** Bond lengths for 2-CM

| Atom | Atom  | Length/Å | Atom | Atom | Length/Å |
|------|-------|----------|------|------|----------|
| C(1) | C(2)  | 1.526(3) | C(3) | O(3) | 1.425(3) |
| C(1) | O(1)  | 1.381(3) | C(4) | C(5) | 1.530(3) |
| C(1) | O(5)  | 1.436(3) | C(4) | O(4) | 1.425(3) |
| C(2) | C(3)  | 1.531(3) | C(5) | C(6) | 1.511(3) |
| C(2) | Cl(1) | 1.796(2) | C(5) | O(5) | 1.442(3) |
| C(3) | C(4)  | 1.524(3) | C(6) | O(6) | 1.424(3) |

**Table S15.** Values of valence angles for 2-CM

| Atom | Atom | Atom  | Angle/°    | Atom | Atom | Atom | Angle/°    |
|------|------|-------|------------|------|------|------|------------|
| O(1) | C(1) | C(2)  | 111.11(18) | C(3) | C(4) | C(5) | 110.02(16) |
| O(1) | C(1) | O(5)  | 107.85(17) | O(4) | C(4) | C(3) | 107.27(16) |
| O(5) | C(1) | C(2)  | 110.07(17) | O(4) | C(4) | C(5) | 110.13(18) |
| C(1) | C(2) | C(3)  | 110.26(18) | C(6) | C(5) | C(4) | 111.09(16) |
| C(1) | C(2) | Cl(1) | 109.99(15) | O(5) | C(5) | C(4) | 109.3(2)   |
| C(3) | C(2) | Cl(1) | 110.44(14) | O(5) | C(5) | C(6) | 107.99(16) |
| C(4) | C(3) | C(2)  | 111.29(16) | O(6) | C(6) | C(5) | 111.94(17) |
| O(3) | C(3) | C(2)  | 110.41(18) | C(1) | O(5) | C(5) | 111.37(15) |
| O(3) | C(3) | C(4)  | 110.51(17) |      |      |      |            |

**Table S16.** Values of torsion angles for 2-CM

| A     | B    | C    | D    | Angle/°     | A     | B    | C    | D     | Angle/°     |
|-------|------|------|------|-------------|-------|------|------|-------|-------------|
| C(1)  | C(2) | C(3) | C(4) | -50.7(2)    | Cl(1) | C(2) | C(3) | O(3)  | -52.1(2)    |
| C(1)  | C(2) | C(3) | O(3) | -173.85(17) | O(1)  | C(1) | C(2) | C(3)  | 175.23(17)  |
| C(2)  | C(1) | O(5) | C(5) | -63.9(2)    | O(1)  | C(1) | C(2) | Cl(1) | 53.2(2)     |
| C(2)  | C(3) | C(4) | C(5) | 51.6(2)     | O(1)  | C(1) | O(5) | C(5)  | 174.76(17)  |
| C(2)  | C(3) | C(4) | O(4) | 171.43(17)  | O(3)  | C(3) | C(4) | C(5)  | 174.69(18)  |
| C(3)  | C(4) | C(5) | C(6) | -176.57(18) | O(3)  | C(3) | C(4) | O(4)  | -65.5(2)    |
| C(3)  | C(4) | C(5) | O(5) | -57.5(2)    | O(4)  | C(4) | C(5) | C(6)  | 65.4(2)     |
| C(4)  | C(5) | C(6) | O(6) | -174.60(18) | O(4)  | C(4) | C(5) | O(5)  | -175.52(16) |
| C(4)  | C(5) | O(5) | C(1) | 64.5(2)     | O(5)  | C(1) | C(2) | C(3)  | 55.8(2)     |
| C(6)  | C(5) | O(5) | C(1) | -174.46(17) | O(5)  | C(1) | C(2) | Cl(1) | -66.2(2)    |
| Cl(1) | C(2) | C(3) | C(4) | 71.0(2)     | O(5)  | C(5) | C(6) | O(6)  | 65.5(2)     |

**Table S17.** Cremer-Pople parameters for crystal structures

| Compound                | $q_2$ | $q_3$ | $Q$   | $\theta$ [°] | $\varphi_2$ [°] |
|-------------------------|-------|-------|-------|--------------|-----------------|
| 2-DG ( $\alpha$ anomer) | 0.060 | 0.548 | 0.551 | 6.0          | 256.0           |
| 2-DG ( $\beta$ anomer)  | 0.038 | 0.562 | 0.563 | 3.9          | 350.4           |
| 2-FG                    | 0.075 | 0.563 | 0.568 | 7.1          | 355.0           |
| 2-CG                    | 0.085 | 0.590 | 0.596 | 7.8          | 344.2           |
| 2-IG                    | 0.057 | 0.588 | 0.591 | 5.5          | 288.0           |
| 2-FM                    | 0.051 | 0.565 | 0.567 | 5.2          | 327.0           |
| 2-CM                    | 0.061 | 0.577 | 0.581 | 6.0          | 348.0           |

**Table S18.** The geometry of hydrogen bonds in the crystal of  $\alpha$ -2-DG

| D-H   | A                 | D-H (Å) | d(D...A) (Å) | <D-H...A (°) |
|-------|-------------------|---------|--------------|--------------|
| O1-H1 | O4 <sup>i</sup>   | 0.84    | 2.780(2)     | 171          |
| O2-H2 | O1 <sup>ii</sup>  | 0.84    | 2.784(2)     | 155          |
| O3-H3 | O5 <sup>iii</sup> | 0.84    | 2.766(2)     | 174          |
| O5-H4 | O2 <sup>iv</sup>  | 0.84    | 2.670(2)     | 170          |
| C2-H6 | O3 <sup>v</sup>   | 0.99    | 3.390(3)     | 148          |
| C2-H7 | O1 <sup>vi</sup>  | 0.99    | 3.344(3)     | 142          |

Symmetry codes: (i)  $x + 1/2, -y + 1/2, -z + 1$ ; (ii)  $-x + 1, y + 1/2, -z + 1/2$ ; (iii)  $x - 1/2, -y + 3/2, -z + 1$ ; (iv)  $-x + 1/2, -y + 1, z + 1/2$ ; (v)  $-x + 1, y - 1/2, -z + 1/2$ ; (vi)  $x - 1, y, z$ .

**Table S19.** The geometry of hydrogen bonds in the crystal of  $b$ -2-DG

| D-H    | A                 | D-H (Å) | d(D...A) (Å) | <D-H...A (°) |
|--------|-------------------|---------|--------------|--------------|
| O1-H9  | O5 <sup>i</sup>   | 0.94    | 2.655(2)     | 169          |
| O2-H10 | O4 <sup>ii</sup>  | 0.61    | 2.739(2)     | 172          |
| O3-H11 | O1 <sup>ii</sup>  | 0.76    | 2.808(2)     | 150          |
| O5-H12 | O2 <sup>iii</sup> | 0.76    | 2.697(2)     | 165          |
| C5-H6  | O3 <sup>iv</sup>  | 1.07    | 3.380(2)     | 147          |
| C6-H8  | O1 <sup>v</sup>   | 1.08    | 3.518(2)     | 146          |

Symmetry codes: (i)  $x - 1, y, z$ ; (ii)  $-x + 1, y - 1/2, -z + 1/2$ ; (iii)  $-x + 3/2, -y + 1, z + 1/2$ ; (iv)  $x - 1/2, -y + 1/2, -z + 1$ ; (v)  $-x + 1/2, -y + 1, z + 1/2$ .

**Table S20.** The geometry of hydrogen bonds in the crystal of 2-FG

| D-H    | A                 | D-H (Å) | d(D...A) (Å) | <D-H...A (°) |
|--------|-------------------|---------|--------------|--------------|
| O1-H1A | O6 <sup>i</sup>   | 0.83(4) | 2.622(3)     | 172(5)       |
| O3-H3A | O5 <sup>ii</sup>  | 0.83(2) | 2.785(3)     | 166(4)       |
| O4-H4A | O3 <sup>*</sup>   | 0.83(4) | 2.955(3)     | 110(3)       |
| O4-H4A | O1 <sup>ii</sup>  | 0.83(4) | 2.786(3)     | 149(4)       |
| O6-H6  | O3 <sup>iii</sup> | 0.83(4) | 2.714(3)     | 175(4)       |
| C5-H5  | O4 <sup>iv</sup>  | 0.98    | 3.353(4)     | 147          |
| C6-H6A | F1 <sup>v</sup>   | 0.97    | 3.325(4)     | 142          |

Symmetry codes: (i)  $x - 1, y, z$ ; (ii)  $-x + 1, y - 1/2, -z + 1/2$ ; (iii)  $-x + 3/2, -y + 1, z + 1/2$ ; (iv)  $x - 1/2, -y + 1/2, -z + 1$ ; (v)  $-x + 1/2, -y + 1, z + 1/2$ ; (\*) intramolecular interaction.

**Table S21.** The geometry of hydrogen bonds in the crystal of 2-CG

| D-H    | A                 | D-H (Å) | d(D...A) (Å) | <D-H...A (°) |
|--------|-------------------|---------|--------------|--------------|
| O1-H1A | O3 <sup>i</sup>   | 0.82(2) | 2.683(3)     | 164(3)       |
| O3-H3A | O6 <sup>ii</sup>  | 0.81(3) | 2.679(3)     | 172(3)       |
| O4-H4A | Cl <sup>iii</sup> | 0.82(3) | 3.321(2)     | 167(2)       |
| O6-H6  | O1 <sup>iii</sup> | 0.82(3) | 2.771(3)     | 171(3)       |
| C2-H2  | O3 <sup>i</sup>   | 0.98    | 3.237(3)     | 128          |
| C5-H5  | O4 <sup>iv</sup>  | 0.98    | 3.485(3)     | 157          |

Symmetry codes: (i)  $x + 1/2, -y + 1/2, -z + 1$ ; (ii)  $x - 1, y, z$ ; (iii)  $x, y + 1, z$ ; (iv)  $-x + 1, y - 1/2, -z + 1/2$ .

**Table S22.** The geometry of hydrogen bonds in the crystal of 2-IG

| D-H    | A                | D-H (Å) | d(D...A) (Å) | <D-H...A (°) |
|--------|------------------|---------|--------------|--------------|
| O1-H1A | O6 <sup>i</sup>  | 0.82(7) | 2.648(9)     | 151(11)      |
| O2-H2A | O5 <sup>ii</sup> | 0.82(8) | 2.771(8)     | 167(11)      |

|        |                   |         |           |         |
|--------|-------------------|---------|-----------|---------|
| O3–H3A | O1 <sup>iii</sup> | 0.82(9) | 2.951(10) | 153(13) |
| O6–H6  | O2 <sup>iv</sup>  | 0.82(5) | 2.832(9)  | 127(8)  |
| O6–H6  | O3 <sup>iv</sup>  | 0.82(5) | 3.169(9)  | 140(9)  |

Symmetry codes: (i)  $x, y - 1, z$ ; (ii)  $x - 1, y, z$ ; (iii)  $x, y + 1, z$ ; (iv)  $x + 1, y, z$ .

**Table S23.** The geometry of hydrogen bonds in the crystal of 2-FM

| D–H    | A                 | D–H (Å) | d(D⋯A) (Å) | < D–H⋯A (°) |
|--------|-------------------|---------|------------|-------------|
| O1–H1A | O6 <sup>i</sup>   | 0.83(5) | 2.665(4)   | 165(6)      |
| O3–H3A | O5 <sup>ii</sup>  | 0.82(2) | 2.726(3)   | 171(6)      |
| O4–H4A | O3 <sup>*</sup>   | 0.82(4) | 2.940(4)   | 107(4)      |
| O4–H4A | O1 <sup>ii</sup>  | 0.82(4) | 2.846(5)   | 163(5)      |
| O6–H6  | F1 <sup>iii</sup> | 0.81(4) | 3.002(4)   | 142(5)      |
| O6–H6  | O3 <sup>iii</sup> | 0.81(4) | 2.714(4)   | 137(4)      |
| C5–H5  | O4 <sup>iv</sup>  | 0.98    | 3.464(5)   | 150         |

**Table S24.** The geometry of hydrogen bonds in the crystal of 2-CM

| D–H      | A                 | D–H (Å) | d(D⋯A) (Å) | < D–H⋯A (°) |
|----------|-------------------|---------|------------|-------------|
| O1W–H1WA | O1 <sup>i</sup>   | 0.85(2) | 2.851(2)   | 171(3)      |
| O1W–H1WA | O1W <sup>ii</sup> | 0.82(3) | 2.629(2)   | 165(3)      |
| O1W–H1WB | O6 <sup>iii</sup> | 0.86(2) | 2.727(2)   | 175.3(19)   |
| O3–H3A   | O5 <sup>i</sup>   | 0.82(3) | 2.814(2)   | 167(3)      |
| O4–H4A   | O3 <sup>iv</sup>  | 0.81(2) | 2.815(2)   | 161(4)      |
| O6–H6    | O4 <sup>v</sup>   | 0.82(3) | 2.663(3)   | 168(3)      |
| C4–H4    | O6 <sup>vi</sup>  | 0.98    | 3.496(3)   | 157         |

Symmetry codes: (i)  $x - 1, y, z$ ; (ii)  $-x + 3, y - 1/2, -z + 1$ ; (iii)  $x - 1, y + 1, z$ ; (iv)  $-x + 2, y - 1/2, -z$ ; (v)  $x + 1, y, z$ ; (vi)  $-x + 3, y + 1/2, -z$ .

**Table S25.** Interaction energies (kJ mol<sup>-1</sup>) for adjacent molecules

| Compound       | N                   | Symmetry operation  | R    | $E_{ele}$ | $E_{pol}$ | $E_{dis}$ | $E_{rep}$ | $E_{tot}$ |
|----------------|---------------------|---------------------|------|-----------|-----------|-----------|-----------|-----------|
| $\alpha$ -2-DG | 2                   | $-x, y+1/2, -z+1/2$ | 6.79 | -34.1     | -6.4      | -15.9     | 45.0      | -26.9     |
|                | 2                   | $x+1/2, -y+1/2, -z$ | 5.95 | -47.0     | -9.9      | -21.4     | 51.1      | -44.1     |
|                | 2                   | $x, y, z$           | 4.85 | -7.8      | -2.2      | -21.2     | 13.9      | -19.7     |
|                | 2                   | $-x+1/2, -y, z+1/2$ | 7.93 | -52.6     | -11.1     | -11.1     | 66.6      | -32.4     |
|                | 2                   | $x+1/2, -y+1/2, -z$ | 6.48 | -45.1     | -11.2     | -22.1     | 56.9      | -40.1     |
| $\beta$ -2-DG  | 2                   | $x, y, z$           | 6.48 | -56.1     | -13.0     | -20.1     | 78.7      | -37.8     |
|                | 2                   | $-x+1/2, -y, z+1/2$ | 6.76 | -6.8      | -1.6      | -11.5     | 7.5       | -13.7     |
|                | 2                   | $-x, y+1/2, -z+1/2$ | 8.48 | -0.2      | -0.5      | -2.7      | 0.1       | -2.8      |
|                | 2                   | $x+1/2, -y+1/2, -z$ | 6.01 | -2.0      | -1.8      | -15.0     | 12.5      | -8.8      |
|                | 2                   | $-x, y+1/2, -z+1/2$ | 5.43 | -73.8     | -17.5     | -27.5     | 87.6      | -60.7     |
|                | 2                   | $x+1/2, -y+1/2, -z$ | 8.52 | -4.5      | -0.5      | -3.4      | 0.6       | -7.8      |
| 2-FG           | 2                   | $-x+1/2, -y, z+1/2$ | 6.73 | -41.2     | -8.4      | -15.5     | 60.9      | -25.7     |
|                | 2                   | $-x, y+1/2, -z+1/2$ | 5.38 | -70.7     | -16.6     | -28.7     | 80.0      | -62.6     |
|                | 2                   | $x, y, z$           | 6.41 | -64.8     | -15.2     | -22.5     | 88.8      | -44.4     |
|                | 2                   | $-x+1/2, -y, z+1/2$ | 7.06 | -40.1     | -7.9      | -14.4     | 58.8      | -24.4     |
|                | 2                   | $x+1/2, -y+1/2, -z$ | 6.18 | -3.2      | -1.9      | -15.9     | 13.8      | -10.2     |
| 2              | $-x+1/2, -y, z+1/2$ | 6.59                | -6.2 | -1.9      | -14.1     | 11.0      | -13.4     |           |

|      |   |                   |      |       |       |       |       |       |
|------|---|-------------------|------|-------|-------|-------|-------|-------|
|      | 2 | x+1/2, -y+1/2, -z | 8.19 | -2.7  | -0.8  | -4.5  | 1.1   | -6.7  |
|      | 2 | -x, y+1/2, -z+1/2 | 8.46 | -1.0  | -0.6  | -1.8  | 0.0   | -3.1  |
|      | 2 | -x+1/2, -y, z+1/2 | 6.71 | -31.7 | -6.5  | -18.7 | 46.3  | -26.0 |
|      | 2 | x, y, z           | 6.53 | -48.0 | -13.8 | -20.8 | 78.2  | -30.8 |
| 2-FM | 2 | x+1/2, -y+1/2, -z | 6.41 | -0.8  | -1.8  | -14.4 | 10.2  | -8.4  |
|      | 2 | -x, y+1/2, -z+1/2 | 5.32 | -79.5 | -20.8 | -30.8 | 93.6  | -68.5 |
|      | 2 | x+1/2, -y+1/2, -z | 8.25 | -10.0 | -1.0  | -3.6  | 0.4   | -14.1 |
|      | 2 | -x+1/2, -y, z+1/2 | 6.67 | -11.5 | -2.9  | -12.4 | 5.8   | -21.5 |
|      | 2 | -x, y+1/2, -z+1/2 | 8.39 | -1.0  | -0.8  | -2.6  | 0.1   | -3.9  |
|      | 2 | -x, y+1/2, -z+1/2 | 5.84 | -8.6  | -2.2  | -19.7 | 16.0  | -17.9 |
|      | 2 | x, y, z           | 6.84 | -53.7 | -11.4 | -21.4 | 73.1  | -38.7 |
| 2-CG | 2 | x+1/2, -y+1/2, -z | 5.45 | -66.0 | -12.9 | -27.0 | 78.9  | -54.0 |
|      | 2 | -x, y+1/2, -z+1/2 | 7.45 | -7.6  | -1.8  | -19.7 | 14.7  | -17.5 |
|      | 2 | x, y, z           | 6.74 | -54.3 | -13.6 | -18.0 | 67.3  | -41.6 |
|      | 1 | -                 | 4.33 | -8.5  | -2.6  | -7.8  | 8.0   | -12.8 |
|      | 2 | x, y, z           | 6.11 | -84.2 | -20.4 | -28.4 | 107.1 | -62.7 |
|      | 2 | -x, y+1/2, -z     | 6.34 | -11.1 | -2.9  | -17.7 | 11.8  | -22.1 |
|      | 2 | -x, y+1/2, -z     | 6.79 | -35.8 | -8.6  | -16.9 | 41.6  | -33.2 |
| 2-CM | 2 | -x, y+1/2, -z     | 6.48 | -16.1 | -2.8  | -18.7 | 16.9  | -24.9 |
|      | 2 | x, y, z           | 7.37 | 2.7   | -1.0  | -10.3 | 8.9   | -1.4  |
|      | 1 | -                 | 5.01 | -47.0 | -9.4  | -6.6  | 54.2  | -28.9 |
|      | 1 | -                 | 4.69 | -33.5 | -6.7  | -8.2  | 38.5  | -23.7 |
|      | 1 | -                 | 4.83 | -57.7 | -13.4 | -5.5  | 69.7  | -32.7 |
|      | 2 | x, y, z           | 6.35 | -73.9 | -14.8 | -31.8 | 79.9  | -67.5 |
|      | 2 | x+1/2, -y+1/2, -z | 7.17 | -9.0  | -0.7  | -12.6 | 20.1  | -8.6  |
|      | 2 | x, y, z           | 6.67 | -73.0 | -18.1 | -26.7 | 95.4  | -54.9 |
| 2-IG | 2 | x+1/2, -y+1/2, -z | 5.22 | -9.5  | -1.8  | -25.3 | 25.4  | -17.8 |
|      | 2 | -x, y+1/2, -z+1/2 | 6.99 | -5.0  | -1.5  | -14.7 | 8.6   | -13.9 |
|      | 2 | -x, y+1/2, -z+1/2 | 9.02 | -5.0  | -1.2  | -20.2 | 16.3  | -13.7 |
|      | 2 | x, y, z           | 9.21 | -5.8  | -0.7  | -5.8  | 5.8   | -8.2  |

**Table S26.** Enrichment ratios of atomic contacts calculated for significant (> 5% of HS) atomic contacts types in the 2-DG and its halogenated analogues

| Compound | Interatomic contact | Enrichment ratio ( $E_{xy}$ ) |
|----------|---------------------|-------------------------------|
| 2-FG     | H...H               | 0.83                          |
|          | H...O               | 1.41                          |
|          | H...F               | 1.27                          |
| 2-FM     | H...H               | 0.88                          |
|          | H...O               | 1.33                          |
|          | H...F               | 1.25                          |
| 2-CG     | H...H               | 0.81                          |
|          | H...O               | 1.41                          |

|                |        |      |
|----------------|--------|------|
|                | H...Cl | 1.35 |
| 2-IG           | H...H  | 0.85 |
|                | H...O  | 1.38 |
| $\alpha$ -2-DG | H...I  | 1.22 |
|                | H...H  | 0.92 |
| $\beta$ -2-DG  | H...O  | 1.29 |
|                | H...H  | 0.92 |
|                | H...O  | 1.28 |

**Table S27.** Conformational analysis of the halogenated analogues of 2-DG in an aqueous solution and in the crystal state.

| Comp.          | Crystal state             |        |              |      |                              | Aqueous solution          |      |              |     |                                                                              |                                                   |
|----------------|---------------------------|--------|--------------|------|------------------------------|---------------------------|------|--------------|-----|------------------------------------------------------------------------------|---------------------------------------------------|
|                | Torsion angle             |        | H-H distance |      | C5-C6 /<br>O6-H6<br>rotamers | Torsion angle             |      | H-H distance |     | C5-C6 (g/t/gg/tg)<br>O6-H6 (g/t) <sup>c</sup><br>rotameric<br>equilibria [%] | anomeric<br>equilibrium<br>( $\alpha/\beta$ ) [%] |
|                | angle                     | [°]    | H-H          | Å]   |                              | angle <sup>b</sup>        | [°]  | H-H          | [Å] |                                                                              |                                                   |
| $\alpha$ -2-FG | -                         | -      | -            | -    | -                            | H1-C1-C2-H2               | +57  | H1 H2        | 2.6 | 45/45/10                                                                     | 43/57                                             |
|                |                           |        |              |      |                              | H2-C2-C3-H3               | +170 | H3 H5        | 3.3 | nd                                                                           |                                                   |
|                |                           |        |              |      |                              | H3-C3-C4-H4               | -174 |              |     |                                                                              |                                                   |
|                |                           |        |              |      |                              | H4-C4-C5-H5               | +180 |              |     |                                                                              |                                                   |
|                |                           |        |              |      |                              | H5-C5-C6-H6               | nd   |              |     |                                                                              |                                                   |
|                |                           |        |              |      |                              | H5-C5-C6-H6'              | nd   |              |     |                                                                              |                                                   |
|                |                           |        |              |      |                              | O5-C5-C6-O6 ( $\omega$ )  | -    |              |     |                                                                              |                                                   |
|                |                           |        |              |      |                              | C5-C6-O6-H06 ( $\theta$ ) | -    |              |     |                                                                              |                                                   |
| $\beta$ -2-FG  | H1-C1-C2-H2               | +172.4 | H1 H3        | 2.70 | gg/trans                     | H1-C1-C2-H2               | +174 | H1 H3        | 2.4 | 50/40/10                                                                     |                                                   |
|                | H2-C2-C3-H3               | -167.2 | H1 H5        | 2.35 |                              | H2-C2-C3-H3               | +171 | H1 H5        | 2.2 | nd                                                                           |                                                   |
|                | H3-C3-C4-H4               | +168.6 | H3 H5        | 2.63 |                              | H3-C3-C4-H4               | +177 | H3 H5        | 3.1 |                                                                              |                                                   |
|                | H4-C4-C5-H5               | -177.0 | H4 H6        | 3.60 |                              | H4-C4-C5-H5               | +173 | H4 H6        | 3.9 |                                                                              |                                                   |
|                | H5-C5-C6-H6               | +60.7  | H5 H6        | 2.35 |                              | H5-C5-C6-H6               | nd   | H5 H6        | 2.7 |                                                                              |                                                   |
|                | H5-C5-C6-H6'              | -58.2  | H5 H6'       | 2.34 |                              | H5-C5-C6-H6'              | nd   | H5 H6'       | 3.5 |                                                                              |                                                   |
|                | O5-C5-C6-O6 ( $\omega$ )  | -61.0  | H6 H6'       | 1.57 |                              | O5-C5-C6-O6 ( $\omega$ )  | -    | H6 H6'       | 1.8 |                                                                              |                                                   |
|                | C5-C6-O6-H06 ( $\theta$ ) | +157.7 |              |      |                              | C5-C6-O6-H06 ( $\theta$ ) | -    |              |     |                                                                              |                                                   |
| $\alpha$ -2-FM | -                         |        |              |      |                              | H1-C1-C2-H2               | -70  | H1 H2        | 2.4 | 50/45/5                                                                      | 65/35                                             |
|                |                           |        |              |      |                              | H2-C2-C3-H3               | -66  | H2 H3        | 2.4 | nd                                                                           |                                                   |
|                |                           |        |              |      |                              | H3-C3-C4-H4               | +180 |              |     |                                                                              |                                                   |
|                |                           |        |              |      |                              | H4-C4-C5-H5               | +174 |              |     |                                                                              |                                                   |
|                |                           |        |              |      |                              | H5-C5-C6-H6               | nd   |              |     |                                                                              |                                                   |
|                |                           |        |              |      |                              | H5-C5-C6-H6'              | nd   |              |     |                                                                              |                                                   |
|                |                           |        |              |      |                              | O5-C5-C6-O6 ( $\omega$ )  | -    |              |     |                                                                              |                                                   |
|                |                           |        |              |      |                              | C5-C6-O6-H06 ( $\theta$ ) | -    |              |     |                                                                              |                                                   |



|                   |                           |        |        |      |                  |                           |      |        |     |          |       |
|-------------------|---------------------------|--------|--------|------|------------------|---------------------------|------|--------|-----|----------|-------|
| $\beta$ -2-FM     | H1-C1-C2-H2               | +54.6  | H1 H2  | 2.34 | <i>gg/trans</i>  | H1-C1-C2-H2               | nd   | H1 H2  | 2.8 | 60/30/10 |       |
|                   | H2-C2-C3-H3               | -53.1  | H1 H3  | 2.69 |                  | H2-C2-C3-H3               | -61  | H1 H3  | 2.7 |          |       |
|                   | H3-C3-C4-H4               | +173.2 | H1 H5  | 2.40 |                  | H3-C3-C4-H4               | -174 | H1 H5  | 2.5 |          |       |
|                   | H4-C4-C5-H5               | -179.7 | H2 H3  | 2.33 |                  | H4-C4-C5-H5               | -179 | H2 H3  | 2.8 |          |       |
|                   | H5-C5-C6-H6               | +57.4  | H3 H5  | 2.57 |                  | H5-C5-C6-H6               | nd   | H3 H5  | 2.8 |          |       |
|                   | H5-C5-C6-H6'              | -61.5  | H5 H6  | 2.33 |                  | H5-C5-C6-H6'              | nd   | H5 H6  | 2.5 |          |       |
|                   | O5-C5-C6-O6 ( $\omega$ )  | -64.2  | H5 H6' | 2.35 |                  | O5-C5-C6-O6 ( $\omega$ )  | -    | H5 H6' | 2.4 |          |       |
|                   | C5-C6-O6-H06 ( $\theta$ ) | -170.4 | H6 H6' | 1.57 |                  | C5-C6-O6-H06 ( $\theta$ ) | -    | H6 H6' | 1.8 |          |       |
| $\alpha$ -2,2'-FG |                           |        |        |      |                  | H3-C3-C4-H4               | +180 | H3 H5  | 2.1 | 50/45/5  | 68/32 |
|                   |                           |        |        |      |                  | H4-C4-C5-H5               | -179 | H4 H6  | 2.7 | nd       |       |
|                   | -                         |        |        |      |                  | H5-C5-C6-H6               | -    | H4 H6' | 2.2 |          |       |
|                   |                           |        |        |      |                  | H5-C5-C6-H6'              | -    | H5 H6  | 2.5 |          |       |
| $\beta$ -2,2'-FG  |                           |        |        |      |                  | H3-C3-C4-H4               | +170 | H1 H3  | 2.4 | nd       |       |
|                   |                           |        |        |      |                  |                           |      | H1 H5  | 2.2 |          |       |
|                   | -                         |        |        |      |                  |                           |      | H6 H6' | 1.8 |          |       |
| $\alpha$ -2-CG    |                           |        |        |      |                  | H1-C1-C2-H2               | +61  | H1 H2  | 2.5 | 45/45/10 | 36/64 |
|                   |                           |        |        |      |                  | H2-C2-C3-H3               | +175 | H1 H5  | 3.3 | 75/25    |       |
|                   |                           |        |        |      |                  | H3-C3-C4-H4               | -175 | H2 H4  | 2.7 |          |       |
|                   |                           |        |        |      |                  | H4-C4-C5-H5               | -179 | H3 H5  | 3.1 |          |       |
|                   |                           |        |        |      |                  | H5-C5-C6-H6               | nd   |        |     |          |       |
|                   |                           |        |        |      |                  | H5-C5-C6-H6'              | nd   |        |     |          |       |
|                   |                           |        |        |      |                  | O5-C5-C6-O6 ( $\omega$ )  | -    |        |     |          |       |
|                   |                           |        |        |      |                  | C5-C6-O6-H06 ( $\theta$ ) | -    |        |     |          |       |
| $\beta$ -2-CG     | H1-C1-C2-H2               | +176.9 | H1 H3  | 2.64 | <i>gg/gauche</i> | H1-C1-C2-H2               | +179 | H1 H3  | 2.5 | 60/30/10 |       |
|                   | H2-C2-C3-H3               | -169.3 | H1 H5  | 2.22 |                  | H2-C2-C3-H3               | +168 | H1 H5  | 2.2 | 80/20    |       |
|                   | H3-C3-C4-H4               | +170.8 | H2 H4  | 2.67 |                  | H3-C3-C4-H4               | -175 | H2 H4  | 2.5 |          |       |
|                   | H4-C4-C5-H5               | +178.4 | H3 H5  | 2.54 |                  | H4-C4-C5-H5               | -179 | H3 H5  | 2.4 |          |       |
|                   | H5-C5-C6-H6               | +55.9  | H4 H6  | 3.09 |                  | H5-C5-C6-H6               | nd   | H4 H6  | 3.1 |          |       |
|                   | H5-C5-C6-H6'              | -60.7  | H5 H6  | 2.30 |                  | H5-C5-C6-H6'              | nd   | H5 H6  | 2.4 |          |       |
|                   | O5-C5-C6-O6 ( $\omega$ )  | -64.3  | H5 H6' | 2.33 |                  | O5-C5-C6-O6 ( $\omega$ )  | -    | H5 H6' | 2.5 |          |       |
|                   | C5-C6-O6-H06 ( $\theta$ ) | -68.7  | H6 H6' | 1.57 |                  | C5-C6-O6-H06 ( $\theta$ ) | -    | H6 H6' | 1.8 |          |       |
| $\alpha$ -2-CM    |                           |        |        |      |                  | H1-C1-C2-H2               | +73  | H1 H2  | 2.4 | 50/40/10 | 46/54 |
|                   |                           |        |        |      |                  | H2-C2-C3-H3               | -57  | H2 H3  | 2.3 | nd       |       |
|                   |                           |        |        |      |                  | H3-C3-C4-H4               | -175 | H3 H5  | 2.4 |          |       |
|                   | -                         |        |        |      |                  | H4-C4-C5-H5               | +180 |        |     |          |       |
|                   |                           |        |        |      |                  | H5-C5-C6-H6               | nd   |        |     |          |       |

|                |  |                           |        |        |      |                           |                           |        |        |     |          |       |
|----------------|--|---------------------------|--------|--------|------|---------------------------|---------------------------|--------|--------|-----|----------|-------|
| $\beta$ -2-CM  |  |                           |        |        |      | H5-C5-C6-H6'              | nd                        |        |        |     |          |       |
|                |  |                           |        |        |      | O5-C5-C6-O6 ( $\omega$ )  | -                         |        |        |     |          |       |
|                |  |                           |        |        |      | C5-C6-O6-H06 ( $\theta$ ) | -                         |        |        |     |          |       |
|                |  | H1-C1-C2-H2               | +54.9  | H1 H2  | 2.33 | $gt^a$                    | H1-C1-C2-H2               | +72    | H1 H2  | 2.3 | 60/30/10 |       |
|                |  | H2-C2-C3-H3               | -51.2  | H1 H3  | 2.60 |                           | H2-C2-C3-H3               | -58    | H1 H3  | 2.3 | nd       |       |
|                |  | H3-C3-C4-H4               | 172.0  | H1 H5  | 2.33 |                           | H3-C3-C4-H4               | -175   | H1 H5  | 2.2 |          |       |
|                |  | H4-C4-C5-H5               | -176.6 | H2 H3  | 2.30 |                           | H4-C4-C5-H5               | -177   | H2 H3  | 2.3 |          |       |
|                |  | H5-C5-C6-H6               | -174.7 | H3 H5  | 2.57 |                           | H5-C5-C6-H6               | nd     | H3 H5  | 2.5 |          |       |
| $\alpha$ -2-IG |  |                           |        |        |      | H5-C5-C6-H6'              | nd                        | H5 H6  | 2.6    |     |          |       |
|                |  | O5-C5-C6-O6 ( $\omega$ )  | +65.6  | H5 H6' | 2.83 |                           | O5-C5-C6-O6 ( $\omega$ )  | -      | H5 H6' | 3.0 |          |       |
|                |  | C5-C6-O6-H06 ( $\theta$ ) | -117.8 | H6 H6' | 1.57 |                           | C5-C6-O6-H06 ( $\theta$ ) | -      | H6 H6' | 1.8 |          |       |
|                |  | H1-C1-C2-H2               | +52.0  | H1 H2  | 2.28 | $gg^a$                    | H1-C1-C2-H2               | +62    | H1 H2  | 2.5 | 45/45/10 | 34/66 |
|                |  | H2-C2-C3-H3               | -174.9 | H2 H4  | 2.47 |                           | H2-C2-C3-H3               | +180   | H2 H4  | 2.8 | nd       |       |
|                |  | H3-C3-C4-H4               | +176.9 | H6 H6' | 1.57 |                           | H3-C3-C4-H4               | -176   | H6 H6' | 1.8 |          |       |
|                |  | H4-C4-C5-H5               | +175.7 |        |      |                           | H4-C4-C5-H5               | -179   |        |     |          |       |
|                |  | H5-C5-C6-H6               | +51.6  |        |      |                           | H5-C5-C6-H6               | nd     |        |     |          |       |
| $\beta$ -2-IG  |  |                           |        |        |      | H5-C5-C6-H6'              | nd                        |        |        |     |          |       |
|                |  |                           |        |        |      | H5-C5-C6-H6'              | nd                        |        |        |     |          |       |
|                |  |                           |        |        |      | O5-C5-C6-O6 ( $\omega$ )  | -                         |        |        |     |          |       |
|                |  |                           |        |        |      | C5-C6-O6-H06 ( $\theta$ ) | -                         |        |        |     |          |       |
|                |  | -                         |        |        |      |                           | H1-C1-C2-H2               | +179   | H1 H3  | 2.4 | 60/30/10 |       |
|                |  |                           |        |        |      |                           | H2-C2-C3-H3               | +177   | H1     | 2.2 | nd       |       |
|                |  |                           |        |        |      |                           | H3-C3-C4-H4               | -176   | H45    | 2.6 |          |       |
|                |  |                           |        |        |      |                           | H4-C4-C5-H5               | +180   | H5 H6  |     |          |       |
| $\alpha$ -2-IM |  |                           |        |        |      | H5-C5-C6-H6               | nd                        |        |        |     |          |       |
|                |  |                           |        |        |      | H5-C5-C6-H6'              | nd                        |        |        |     |          |       |
|                |  |                           |        |        |      | O5-C5-C6-O6 ( $\omega$ )  | -                         |        |        |     |          |       |
|                |  |                           |        |        |      | C5-C6-O6-H06 ( $\theta$ ) | -                         |        |        |     |          |       |
|                |  | -                         |        |        |      |                           | H1-C1-C2-H2               | -75    | H1 H2  | 2.6 | 50/40/10 | 38/62 |
|                |  |                           |        |        |      |                           | H2-C2-C3-H3               | -56    | H2 H3  | 2.5 | 90/10    |       |
|                |  |                           |        |        |      |                           | H3-C3-C4-H4               | -176   | H3 H5  | 2.6 |          |       |
|                |  |                           |        |        |      |                           | H4-C4-C5-H5               | -179   | H5 H6  | 2.8 |          |       |
| $\beta$ -2-IM  |  |                           |        |        |      | H5-C5-C6-H6               | nd                        | H5 H6' | 3.0    |     |          |       |
|                |  |                           |        |        |      | H5-C5-C6-H6'              | nd                        |        |        |     |          |       |
|                |  |                           |        |        |      | O5-C5-C6-O6 ( $\omega$ )  | -                         |        |        |     |          |       |
|                |  |                           |        |        |      | C5-C6-O6-H06 ( $\theta$ ) | -                         |        |        |     |          |       |
| $\beta$ -2-IM  |  |                           |        |        |      |                           | H1-C1-C2-H2               | nd     | H1 H2  | 2.3 | 60/30/10 |       |
|                |  |                           |        |        |      |                           | H2-C2-C3-H3               | +52    | H1 H3  | 2.3 | nd       |       |

|                |                           |              |        |        |      |                           |              |        |        |     |          |       |
|----------------|---------------------------|--------------|--------|--------|------|---------------------------|--------------|--------|--------|-----|----------|-------|
| $\alpha$ -2-DG |                           |              |        |        |      | H3-C3-C4-H4               | -175         | H1 H5  | 2.2    |     |          |       |
|                |                           |              |        |        |      | H4-C4-C5-H5               | -179         | H2 H3  | 2.3    |     |          |       |
|                |                           |              |        |        |      | H5-C5-C6-H6               | nd           | H3 H5  | 2.6    |     |          |       |
|                |                           |              |        |        |      | H5-C5-C6-H6'              | nd           | H5 H6  | 2.5    |     |          |       |
|                |                           |              |        |        |      | O5-C5-C6-O6 ( $\omega$ )  | -            | H5 H6' | 2.9    |     |          |       |
|                |                           |              |        |        |      | C5-C6-O6-H06 ( $\theta$ ) | -            | H6 H6' | 1.8    |     |          |       |
|                |                           | H1-C1-C2-H2  | -68.7  | H1 H2  | 2.41 | <i>gt</i> <sup>a</sup>    | H1-C1-C2-H2  | +58    | H1 H2  | 2.5 | 45/45/10 | 49/51 |
|                |                           | H1-C1-C2-H2' | 49.0   | H1 H2' | 2.30 |                           | H1-C1-C2-H2' | nd     | H1 H2' | 2.5 | nd       |       |
|                |                           | H2-C2-C3-H3  | -52.9  | H2 H2' | 1.60 |                           | H2-C2-C3-H3  | -56    | H2 H2' | 1.8 |          |       |
|                |                           | H2'-C2-C3-H3 | -170.6 | H2 H3  | 2.33 |                           | H2'-C2-C3-H3 | +180   | H2 H3  | 2.5 |          |       |
| $\beta$ -2-DG  |                           |              |        |        |      | H3-C3-C4-H4               | -175         | H2' H4 | 2.6    |     |          |       |
|                |                           |              |        |        |      | H4-C4-C5-H5               | -179         | H3 H5  | 2.5    |     |          |       |
|                |                           |              |        |        |      | H5-C5-C6-H6               | nd           | H6 H6' | 1.8    |     |          |       |
|                |                           |              |        |        |      | H5-C5-C6-H6'              | nd           |        |        |     |          |       |
|                |                           |              |        |        |      | O5-C5-C6-O6 ( $\omega$ )  | -            |        |        |     |          |       |
|                |                           |              |        |        |      | C5-C6-O6-H06 ( $\theta$ ) | -            |        |        |     |          |       |
|                |                           | H1-C1-C2-H2  | +54.8  | H1 H2  | 2.43 | <i>gg/trans</i>           | H1-C1-C2-H2  | +59    | H1 H2  | 2.4 | 60/30/10 |       |
|                |                           | H1-C1-C2-H2' | +174.9 | H1 H2' | 3.03 |                           | H1-C1-C2-H2' | +179   | H1 H2' | 3.4 | nd       |       |
|                |                           | H2-C2-C3-H3  | -51.1  | H1 H3  | 2.65 |                           | H2-C2-C3-H3  | -56    | H1 H3  | 2.4 |          |       |
|                |                           | H2'-C2-C3-H3 | -170.7 | H1 H5  | 2.39 |                           | H2'-C2-C3-H3 | +180   | H1 H5  | 2.2 |          |       |
|                | H3-C3-C4-H4               | +170.6       | H2 H2' | 1.76   |      | H3-C3-C4-H4               | -175         | H2 H2' | 1.8    |     |          |       |
|                | H4-C4-C5-H5               | -177.1       | H2 H3  | 2.39   |      | H4-C4-C5-H5               | -179         | H2 H3  | 2.4    |     |          |       |
|                | H5-C5-C6-H6               | +58.0        | H2' H4 | 2.66   |      | H5-C5-C6-H6               | nd           | H2' H4 | 2.5    |     |          |       |
|                | H5-C5-C6-H6'              | -61.8        | H4 H6  | 3.12   |      | H5-C5-C6-H6'              | nd           | H4 H6  | 2.5    |     |          |       |
|                | O5-C5-C6-O6 ( $\omega$ )  | -64.8        | H5 H6  | 2.42   |      | O5-C5-C6-O6 ( $\omega$ )  | -            | H5 H6  | 2.2    |     |          |       |
|                | C5-C6-O6-H06 ( $\theta$ ) | 157.4        | H5 H6' | 2.45   |      | C5-C6-O6-H06 ( $\theta$ ) | -            | H5 H6' | 2.5    |     |          |       |
|                |                           |              | H6 H6' | 1.77   |      |                           |              | H6 H6' | 1.8    |     |          |       |

<sup>a</sup> conformation between *cis* and *trans* conformers

<sup>b</sup> for torsion angles H5-C5-C6-H6 and H5-C5-C6-H6' the values could not be determined for the each rotamer using available NMR data. In the case of  $\omega$  angle it has been assumed that values are  $-60^\circ (\pm 5)$ ,  $-60^\circ (\pm 5)$ ,  $-180^\circ (\pm 5)$  for the rotamers *gg*, *gt*, *tg* respectively. The value of  $\theta$  was assumed to be  $(\pm) 60^\circ$  or  $180^\circ$  for *cis* and *gauche* conformers respectively

<sup>c</sup> estimated only on the basis of  $J_{6,6}$  values

**Table S28.**  $^1\text{H}$ - $^{13}\text{C}$  HSQC and  $^1\text{H}$  NMR data for halogenated analogues of 2-DG and the parental compound. NMR shifts values are measured in ppm and  $J$ -coupling constants in Hz

| Compound       | H1; C1      | H2; C2      | H3; C3      | H4; C4      | H5; C5                  | H6; H6'; C6 |
|----------------|-------------|-------------|-------------|-------------|-------------------------|-------------|
|                | $J_{1,2}$   | $J_{2,3}$   | $J_{3,4}$   | $J_{4,5}$   | $J_{5,6R}$ ; $J_{5,6S}$ | $J_{6,6}$   |
| $\alpha$ -2-FG | 5.31; 91.65 | 4.28; 92.22 | 3.96; 73.17 | 3.46; 71.22 | 3.85; 73.27             | -           |

|                  |             |             |             |             |             |      |
|------------------|-------------|-------------|-------------|-------------|-------------|------|
|                  | 3.9         | 9.5         | 9.6         | 10.0        | 5.3; 2.2    |      |
| $\beta$ -2-FG    | 4.77; 95.53 | 3.97; 94.89 | 3.78; 76.04 | 3.22; 71.22 | 3.26; 78.06 | -    |
|                  | 7.9         | 9.1         | 9.5         | 10.0        | 5.9; 2.2    |      |
| $\alpha$ -2-FM   | 5.24; 93.32 | 4.63; 92.38 | 3.79; 71.47 | 3.46; 68.87 | 3.85; 74.32 | -    |
|                  | 2.2         | 2.3         | 10.0        | 10.3        | 5.7; 2.1    | -    |
| $\beta$ -2-FM    | 4.87; 94.36 | 4.67; 93.35 | 3.76; 73.86 | 3.38; 68.65 | 3.20; 78.13 | -    |
|                  | nd          | 2.6         | 10.0        | 9.7         | 6.7; 2.3    | -    |
| $\alpha$ -2-diFG | 5.14; 92.69 | -;          | 4.03; 72.41 | 3.61; 70.42 | 3.94; 73.83 | -    |
|                  | -           |             | 10.1        | 10.4        | 5.5; 2.0    |      |
| $\beta$ -2-diFG  | 4.89; 93.60 | -;          | 3.67; 74.89 |             |             |      |
|                  | -           |             | 8.6         | nd          | nd; nd      | -    |
| $\alpha$ -2-CG   | 5.22; 94.09 |             | 3.70; 74.82 | 3.35; 72.39 | 3.91; 73.70 | -    |
|                  | 3.4         | 10.4        | 9.5         | 10.0        | 5.2; 2.4    | 11.8 |
| $\beta$ -2-CG    | 4.72; 97.85 | 3.33; 65.07 | 3.65; 78.22 | 3.19; 72.07 | 3.52; 78.03 | -    |
|                  | 8.5         | 8.7         | 9.5         | 9.5         | 6.4; 2.6    | 12.0 |
| $\alpha$ -2-CM   | 5.25; 95.92 | 4.24; 64.02 | 4.02; 70.92 | 3.52; 68.50 | 3.88; 74.95 | -    |
|                  | 1.6         | 3.8         | 9.6         | 10.2        | 5.8; 2.3    | -    |
| $\beta$ -2-CM    | 5.02; 94.03 | 4.34; 66.96 | 3.83; 73.84 | 3.66; 68.16 | 3.44; 78.75 | -    |
|                  | 1.2         | 3.5         | 9.6         | 9.8         | 6.5; 2.4    | -    |
| $\alpha$ -2-IG   | 5.30; 95.36 | 4.01; 34.91 | 3.64; 75.32 | 3.33; 72.57 | 3.93; 74.00 | -    |
|                  | 3.2         | 11.2        | 9.3         | 9.9         | 5.2; 2.4    | -    |
| $\beta$ -2-IG    | 4.88; 98.61 | 3.78; 38.42 | 3.47; 79.08 | 3.16; 72.26 | 3.51; 77.97 | -    |
|                  | 9.2         | 10.6        | 9.3         | 9.9         | 6.0; 2.0    | -    |
| $\alpha$ -2-IM   | 5.47; 97.49 | 4.38; 39.08 | 3.17; 69.85 | 3.48; 70.95 | 3.92; 75.28 | -    |
|                  | 1.4         | 4.2         | 9.3         | 9.7         | 5.9; 2.3    | 12.3 |
| $\beta$ -2-IM    | 4.11; 93.44 | 4.50; 46.48 | 3.10; 72.89 | 3.53; 70.66 | 3.47; 78.96 | -    |
|                  | 1.5         | 3.9         | 9.4         | 9.7         | 6.4; 2.2    | -    |
| $\alpha$ -2-DG   | 5.25; 93.27 |             | 3.93; 69.94 | 3.23; 73.14 | 3.80; 73.98 | -    |

|               |             |                           |             |             |             |   |
|---------------|-------------|---------------------------|-------------|-------------|-------------|---|
|               | nd; 3.5     | 2.00; 1.68;               | 9.4         | 9.7         | 5.3; 2.5    | - |
|               |             | 39.24                     |             |             |             |   |
| $\beta$ -2-DG | 4.95; 95.37 | 13.4 <sup>b</sup> ; 12.4; | 3.71; 72.44 | 3.03; 72.82 | 3.37; 77.98 | - |
|               | 10.1; 1.8   | 5.1                       | 9.4         | 9.6         | 6.6; 2.6    | - |
|               |             | 2.24; 1.49;               |             |             |             |   |
|               |             | 41.47                     |             |             |             |   |
|               |             | 12.4 <sup>b</sup> ; 12.0; |             |             |             |   |
|               |             | 5.1                       |             |             |             |   |

<sup>a</sup> Taken from Fokt 2009

<sup>b</sup>  $J_{2,2}$

**Table S29.** <sup>19</sup>F NMR data for fluorinated analogues of 2-DG. NMR shifts values are measured in ppm and  $J$ -coupling constants in Hz

| Compound         | $J_{F2,H1}$ | F2; $J_{F2,H2}$ | $J_{F2,H3}$ | $J_{F2,H4}$ | $J_{F2,H5}$ | $J_{F2,H6}$ |
|------------------|-------------|-----------------|-------------|-------------|-------------|-------------|
| $\alpha$ -2-FG   | 0.0         | ;49.4           | 13.4        | 3.3         | nd          | nd          |
| $\beta$ -2-FG    | 2.4         | 51.5            | 15.1        | 4.4         | nd          | nd          |
| $\alpha$ -2-FM   | 7.3         | 49.2            | 31.3        | nd          | nd          | nd          |
| $\beta$ -2-FM    | 20.4        | 51.5            | 30.9        | nd          | nd          | nd          |
| $\alpha$ -2-diFG | 0.1; 6.5    | ; -             | 22.4; 5.1   | nd          | nd          | nd          |
| $\beta$ -2-diFG  | 0.7; 16.0   | ; -             | 21.5; 5.8   | nd          | nd          | nd          |

**Table S30.** The geometry of hydrogen bonds between 2-FG and protein residues for 3K4L structure

| D            | A           | D-H (Å) | d(D...A) (Å) |
|--------------|-------------|---------|--------------|
| SHG 901 O1   | ASP 452 OD2 | 1.863   | 2.637        |
| SHG 901 O3   | HIS 548 NE2 | 1.759   | 2.518        |
| SHG 901 O4   | VAL 546 O   | 1.759   | 2.787        |
| GLN 448 HE22 | SHG 901 F1  | 2.135   | 2.960        |
| ASN 593 ND2  | SHG 901 O3  | 1.884   | 2.692        |

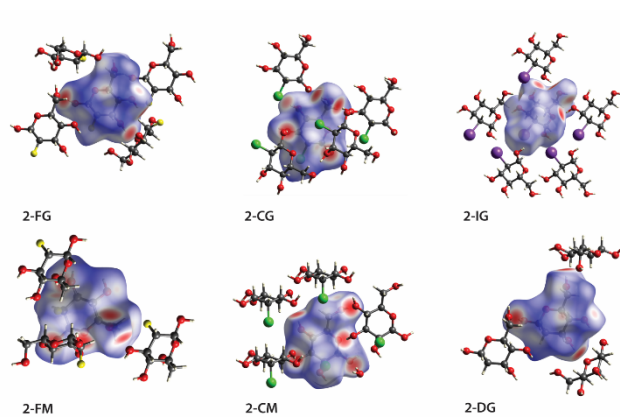

**Figure S1.** Hirshfeld surfaces mapped onto  $d_e$ . Intermolecular contacts which are closer than the sum of their Van der Waals radii are highlighted in red on the  $d_e$  surface, whereas longer contacts are blue. Contacts having similar lengths to the radii sum are depicted as white.

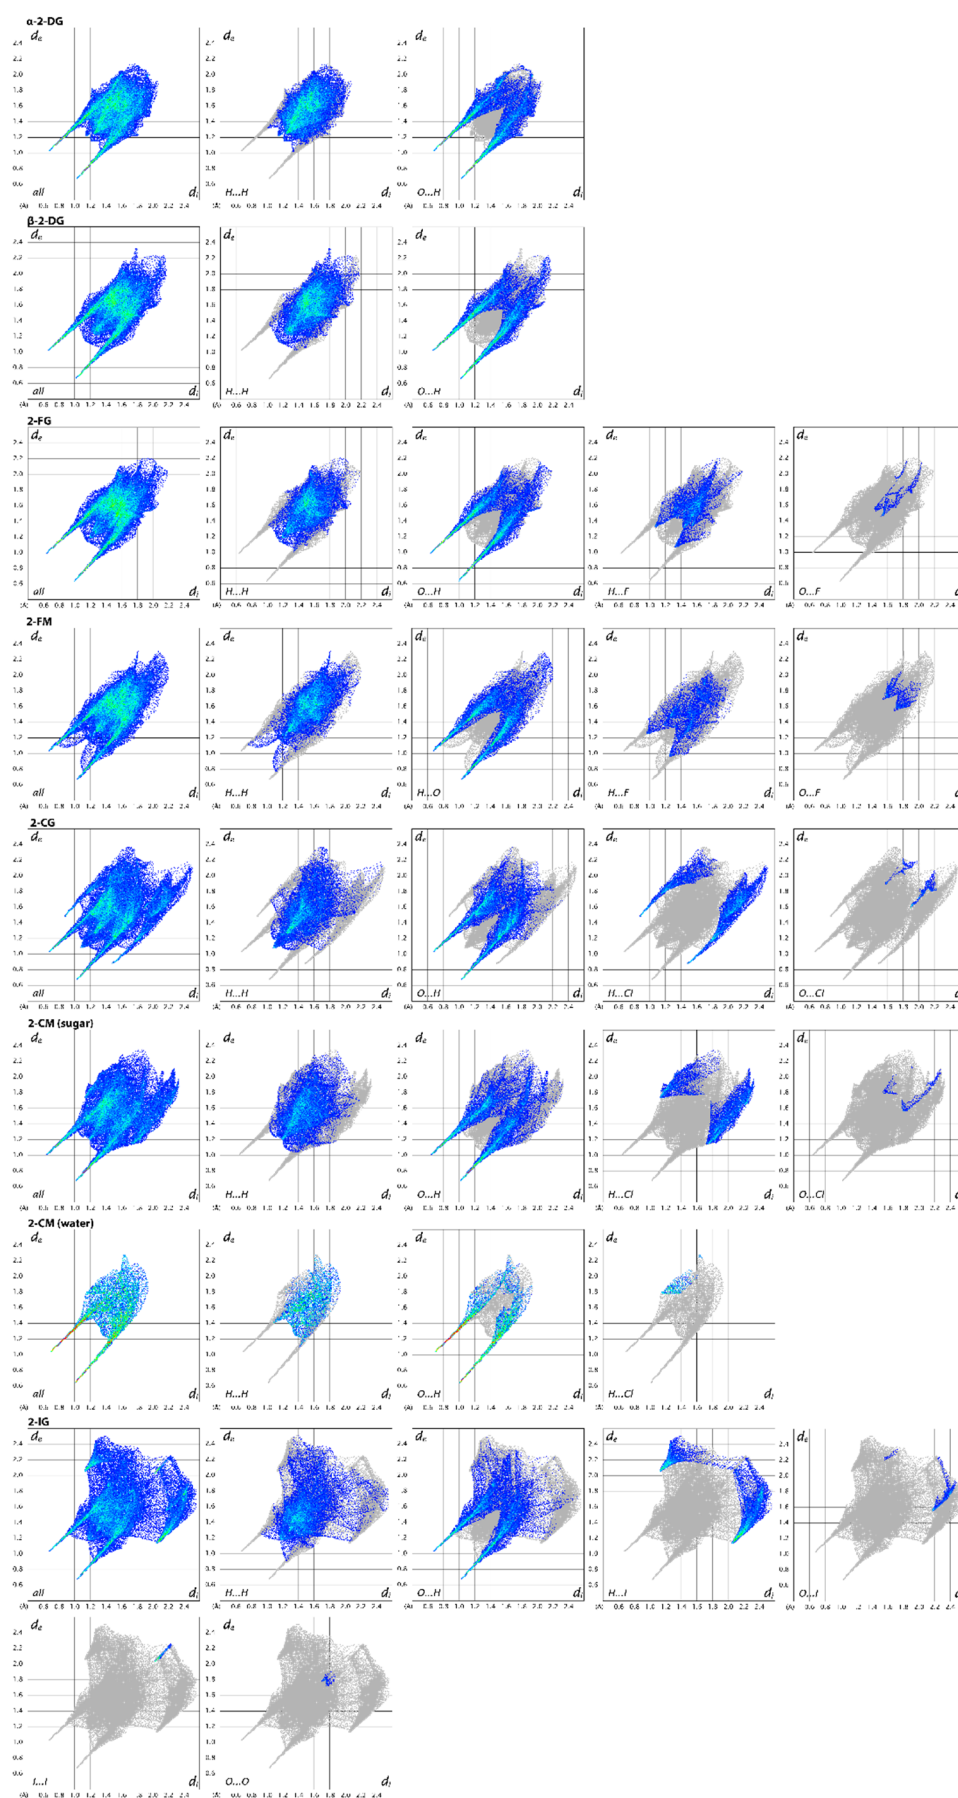

Figure 2. Contribution of different X-X contacts for each crystal lattice discussed in the article.

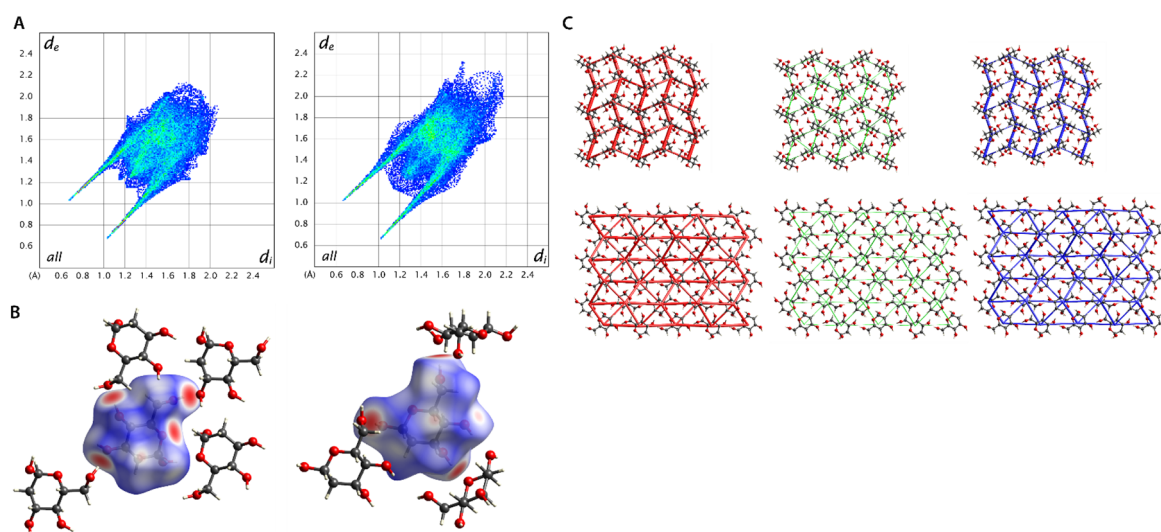

**Figure S3.** A. comparison between fingerprint plots between  $\alpha$  (left) and  $\beta$  (right) anomers of 2-DG B. Comparison between Hirshfeld surfaces between these structures ( $\alpha$  on the left and  $\beta$  on the right) and their energy frameworks (C) where  $\beta$  anomer is on the top and  $\alpha$  in the bottom.

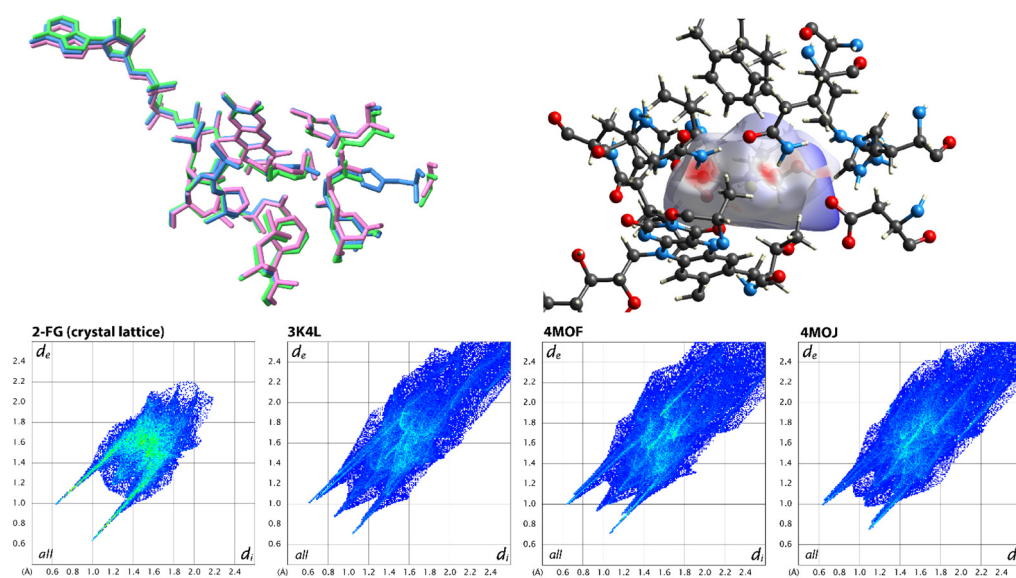

**Figure S4.** Structural alignment of amino-acid residues involving in 2-FG binding in 3K4L (green), 4MOF (blue) and 4 MOJ (pink, top-right) an exemplary Hirshfeld surface calculated for 2-FG in 3K4L complex (top-left) and comparison between fingerprint plots for 2-FG in crystal lattice and different protein-ligand complexes.



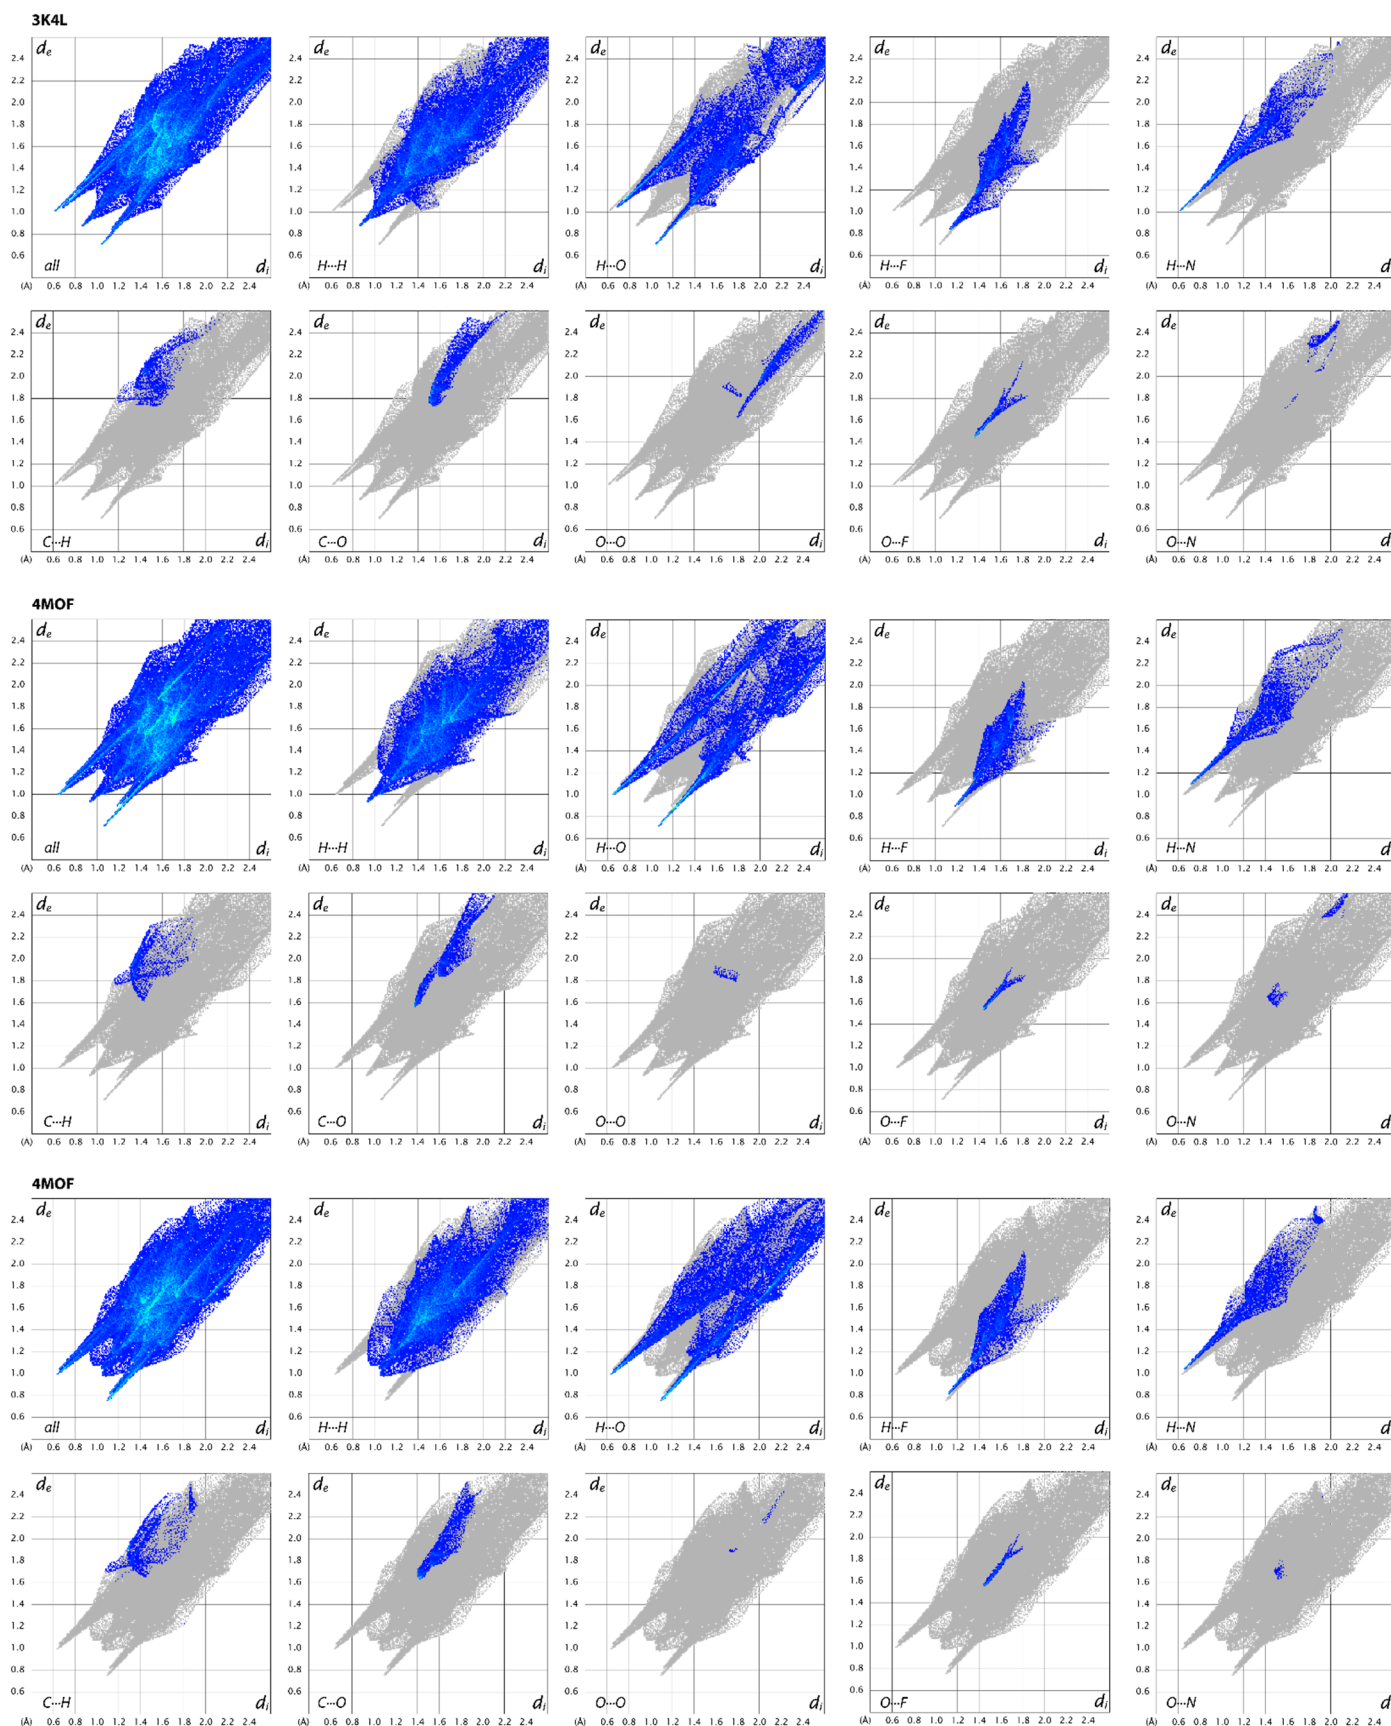

**Figure S5.** Contribution of different X-X contacts for each protein-ligand complex discussed in the article
